# Supplementary material for: GLIPR2: a potential biomarker and therapeutic target unveiled – Insights from extensive pan-cancer analyses, with a spotlight on lung adenocarcinoma
Source: Front Immunol. 2024 Feb 26;15:1280525. doi: 10.3389/fimmu.2024.1280525 (PMC10929020; doi:10.3389/fimmu.2024.1280525)
Supplement: Supplementary file 7 [file Table_1.xlsx]

## Sheet: nantong tumor hospital cohort 
Table S1 Demographics and characteristics of patients in Nantong Tumor Hospital cohort
Variables
N	301
Gender, n (%)
Male	182 (24.9%)
Female	119 (16.3%)
Age, median (IQR)	64 (59, 70)
T, n (%)
1	116 (16.2%)
2	118 (16.5%)
3	42 (5.9%)
4	11 (1.5%)
N, n (%)
0	175 (24.5%)
1	64 (9%)
2	45 (6.3%)
3	1 (0.1%)
M, n (%)
0	298 (40.8%)
1	3 (0.4%)
Stage, n (%)
I-II	190 (26%)
III-IV	111 (15.2%)
Smoking, n (%)
Yes	118 (16.2%)
No	180 (24.7%)
Pathological type n (%)
Squamous carcinoma	86 (11.9%)
Adenocarcinoma	197 (27.2%)
Others	12 (1.7%)
Progress, n (%)
No or unknown	229 (31.3%)
Yes	72 (9.8%)
